# Identification of Cancer-associated Metabolic Vulnerabilities by Modeling Multi-objective Optimality in Metabolism

Ziwei Dai<sup>1</sup>, Liyan Xu<sup>4</sup>, Hongrong Hu<sup>4</sup>, Kun Liao<sup>4</sup>, Shuye Deng<sup>4</sup>, Qiyi Chen<sup>4</sup>, Shiyu Yang<sup>4</sup>, Qian Wang<sup>2</sup>, Shuaishi Gao<sup>1</sup>, Bo Li<sup>4\*</sup>, Luhua Lai<sup>1,2,3\*</sup>

1. Center for Quantitative Biology, Academy for Advanced Interdisciplinary Studies, Peking University, Beijing 100871, China
2. Beijing National Laboratory for Molecular Sciences, State Key Laboratory for Structural Chemistry of Unstable and Stable Species, College of Chemistry and Molecular Engineering, Peking University, Beijing 100871, China
3. Peking-Tsinghua Center for Life Sciences, Peking University, Beijing 100871, China
4. Department of Biochemistry and Molecular Biology, Zhongshan School of Medicine, Sun Yat-Sen University, Guangzhou 510080, China

## Abstract

Computational modeling of the genome-wide metabolic network is essential for designing new therapeutics targeting cancer-associated metabolic disorder, which is a hallmark of human malignancies. However, previous studies generally assumed that metabolic fluxes of cancer cells are subjected to the maximization of biomass production, despite the wide existence of trade-offs among multiple metabolic objectives. To address this issue, we developed a multi-objective model of cancer metabolism with algorithms depicting approximate Pareto surfaces and incorporating multiple omics datasets. To validate this approach, we built individualized models for NCI-60 cancer cell lines, and accurately predicted cell growth rates and other biological consequences of metabolic perturbations in these cells. By analyzing the landscape of approximate Pareto surface, we identified a list of metabolic targets

essential for cancer cell proliferation and the Warburg effect, and further demonstrated their close association with cancer patient survival. Finally, metabolic targets predicted to be essential for tumor progression were validated by cell-based experiments, confirming this multi-objective modelling method as a novel and effective strategy to identify cancer-associated metabolic vulnerabilities.

## **Introduction**

Since Otto Warburg's first description that cancer cells exhibit abnormally high glucose uptake and concomitant lactate secretion (Warburg, 1956), metabolic alteration is widely noted as a hallmark of cancer (Boroughs and DeBerardinis, 2015; DeBerardinis and Chandel, 2016; Hanahan and Weinberg, 2011; Pavlova and Thompson, 2016). Besides the "wasteful" metabolism known as aerobic glycolysis or the Warburg effect (Dai et al., 2016; Liberti and Locasale, 2016), metabolism in malignant cells are shifted at the systematic level due to numerous factors including nutrient and oxygen availability in the tumor microenvironment, materials and energy required for rapid cell proliferation, as well as oncogenic signaling pathways. Thus, targeting metabolic reprogramming in cancer is a promising strategy for designing anti-tumor therapeutics (Cheong et al., 2012; Martinez-Outschoorn et al., 2017; Vander Heiden, 2011; Vernieri et al., 2016).

While traditional methods are suited to dissect limited numbers of metabolic pathways, systems biology is a powerful tool to study metabolism from a global

perspective(Yizhak et al., 2015). Within the field of cancer metabolism, analyses of genome-scale metabolic models (GSMMs)(Thiele and Palsson, 2010; Thiele et al., 2013) enabled researchers to elucidate the plausible mechanism of Warburg effect(Shlomi et al., 2011), quantify efficacies and side effects of cancer therapeutics(Agren et al., 2014; Folger et al., 2011; Shaked et al., 2016; Yizhak et al., 2014a; Yizhak et al., 2014b), and unravel context-dependent functionality of metabolic enzymes during tumor progression(Frezza et al., 2011; Megchelenbrink et al., 2015; Rabinovich et al., 2015; Tardito et al., 2015). Among various strategies, flux balance analysis (FBA) exhibits itself as a highly effective approach to analyze GSMMs(Orth et al., 2010). FBA commonly assumes that cells organize metabolic fluxes by perusing metabolic objectives subjected to certain stoichiometric constraints and upper/ lower limits. The assumption of maximized biomass production (representing for optimal cancer cell growth) has been widely used in previous studies modeling cancer metabolism.

Despite the rapid development in modeling cancer metabolism, the fundamental assumption of most computational methods – maximization of growth rate in cancer cells – is still open to doubt. Although studies investigating the metabolic objectives of cancer cells were scarce, several studies focusing on unicellular organisms provided useful insights(Gianchandani et al., 2008; Knorr et al., 2007; Schuetz et al., 2007). Interestingly, the hypothesis of single-objective metabolic optimization was challenged even in *Escherichia coli*. Comparison of experimentally-measured metabolic fluxes and the Pareto-optimal surface defined by multiple metabolic

objectives revealed that cellular metabolism may be determined by trade-off among three competing objectives: maximization of biomass yield, maximization of ATP production, and minimization of gross metabolic fluxes(Schuetz et al., 2012). Similarly, the trade-off between biomass yield and ATP production was also considered as one plausible mechanism underlying tumor-associated metabolic disorders including the Warburg effect(Pfeiffer et al., 2001).

In line with these findings, we present here the first theoretical strategy involving multi-objective optimality for modeling cancer metabolism to our best knowledge. Specifically, we developed algorithms for sampling balanced flux configurations with Pareto optimality and building individualized models based on publically-available omics data. To demonstrate our methodology, we constructed individualized models for NCI-60 cancer cell lines and predicted the impact of metabolic gene ablation on Pareto optimality, metabolism, and cell viability. With this approach, we identified a list of metabolic enzymes essential for cell proliferation and aerobic glycolysis (the Warburg effect), and further validated this list through survival analysis and cell-based experiments. These metabolic hubs will likely improve our understanding of cancer-associated metabolic disorders, and provide potential targets for novel cancer therapeutics.

## **Results**

### **Four-objective optimization model for cancer metabolism**

Metabolism is pivotal for biomass synthesis and energy production

indispensable for cell viability. However, these two goals contradict with each other to some extent during cell division. For instance, when glucose is completely oxidized to carbon dioxide to generate maximal amounts of ATP, it can no longer be utilized as biomass precursors for amino acid and nucleotide biosynthesis. Therefore, we reasoned that the distribution of metabolic flux can only be comprehensively determined by multiple biological objectives (Fig 1A), including (1) maximization of biomass production, which is frequently considered as the only objective in previous FBA studies of cancer cells (Folger et al., 2011; Gatto et al., 2015; Megchelenbrink et al., 2015; Yizhak et al., 2014a), (2) maximization of ATP hydrolysis, which is considered as the objective in some FBA studies of non-malignant cells (Folger et al., 2011; Yizhak et al., 2014b), (3) minimization of total abundance of metabolic enzymes, which is an analogue of the solvent capacity constraint (Shlomi et al., 2011; Vazquez et al., 2010), and (4) minimization of total carbon uptake (Savinell and Palsson, 1992). These four objectives reflect different aspects of metabolic demand, covering both maximization of biomass yield and minimization of energy cost. Combining them with a genome-scale metabolic network Recon 1 (Duarte et al., 2007), we created a multi-objective linear programming model (Fig 1B), which serves as the theoretical framework for our subsequent analysis (see Materials and Methods for details).

Based on this model, we quantitatively describe the trade-off among multiple metabolic objectives by considering solutions with Pareto optimality (Fig 1B). Pareto optimality is defined by inability to further optimize one objective function without

making any other objectives worse off. For instance, a metabolic flux configuration with Pareto optimality with regarding to the two objectives of maximizing biomass and ATP yield is one that cannot be altered to yield both higher biomass synthesis and higher ATP production. To uniformly sample from all solutions with Pareto optimality, we designed an algorithm based on  $\epsilon$ -constraint method(Mavrotas, 2009), namely branched  $\epsilon$ -constraint method (BECM). The resulting collection of all Pareto solutions, or the Pareto surface, can be visualized by projection to any ternary combinations of the metabolic objectives as mentioned above (Fig 1B).

### **Individualized Pareto models accurately predict cell proliferation and responses to metabolic gene ablations in NCI-60 cancer cell lines**

To further validate the four-objective optimization method in modeling cancer metabolism, Pareto optimality is assumed to be achieved in the examined cancer cells or tissue types, and their metabolic flux configurations could be reconstructed by searching for Pareto solutions harboring the highest consistency with protein expression and metabolic flux profiles. To do this, we developed a population-based strategy based on the assumption that for a fixed metabolic pathway, the corresponding enzymatic expression correlates with its governed metabolic flux (Fig 2A). Specifically, we used multi-omics datasets including LC-MS/MS based proteomics(Gholami et al., 2013) and consumption-release (CORE) profiles of metabolites(Jain et al., 2012) to reconstruct Pareto models for NCI-60 cell lines.

We then validated the Pareto models by comparing model-predicted biomass

fluxes to the actual cell growth rates, and found that theoretical biomass production fluxes accurately predict the cell growth rates as previously reported (Fig 2B, Spearman's rank correlation coefficient = 0.68). Moreover, model-predicted metabolic fluxes positively correlate with pathway-level protein expression profiles and experimentally-measured metabolic fluxes, demonstrating that our Pareto models successfully recapitulate cancer-associated metabolic phenotypes (Fig S1). Convergence to different solutions only slightly affect prediction results (Fig S2), while fewer metabolic objectives (Fig S3) or less omics data input (proteomics or CORE only, Fig S4) would significantly reduce prediction accuracies, suggesting that all four objectives and both omics datasets are indispensable for modeling the metabolic landscape of cancer cells.

Next, we applied this model to predict cellular responses to metabolic gene ablations and compared the calculated results with Achilles, a genome-scale gene essentiality database (Cowley et al., 2014). Based on the assumption of Pareto optimality in modeling cancer metabolism, the distance between a metabolic flux configuration and the Pareto surface reflects how fitness of cells bearing such flux configuration is impaired. To better quantify this deviation, we defined a Pareto deviation score (PDS) as the Euclidean distance between the flux configuration after metabolic gene knockdown and the Pareto surface (Fig 2C, Materials and Methods). For each metabolic gene registered in Achilles and associated with only one reaction in Recon 1 (245 in total), we simulated the flux configurations after its knockdown in all NCI-60 cell lines and computed the PDS values. Then we compared the resultant

PDS with sensitivity scores in Achilles and demonstrated their positive correlations in a majority of examined genes (Fig 2D,  $p < 0.001$ , Wilcoxon's signed-rank test), thus corroborating the close association between theoretical deviations from Pareto optimality in achieving all four objectives and impairments of cell viability.

### **Metabolic targets identified by Pareto surface analysis are essential for cancer progression**

Given that model-predicted PDS values reflect sensitivities to metabolic perturbation, we next sought to identify anti-tumor metabolic targets using this novel model. It is noted that rapid proliferation and the Warburg effect (fermentation of glucose in the presence of oxygen) are essential features of cancer cells, with the latter more related to tumor metastasis and drug resistance (Gatenby and Gillies, 2004; Liberti and Locasale, 2016). Counteracting these two features are critical for developing anti-tumor therapies. Therefore, we designed a perturbation strategy leading to larger Pareto deviation in flux configurations with increased biomass production or enhanced Warburg effect, aiming to selectively impair the viability of malignant cells. This perturbation can be achieved by activation or inhibition of metabolic enzymes, which can be quantified in our model as increased or decreased metabolic fluxes governed by a particular enzyme. Without loss of generality, we were able to use cell growth rate as a representative phenotype to illustrate our strategy for target identification. Next, we projected the Pareto surface to a two-dimensional space spanned by growth rate and one specific metabolic flux, in a



way that we can clearly define its lower and upper bounds (Fig 3A). Candidate targets can be identified based on the boundaries of projected Pareto surface. After that, we examined how the upper bound of metabolic flux varies with cell growth rate. If the upper bound decreases with growth rate, activation of this enzyme would lead to larger Pareto deviation for flux configurations with higher growth rate, thus conferring selectivities on cells with different growth rates (Fig 3A). Conversely, inhibition of an enzyme would impair the viability of fast-growing cancer cells, if the lower bound rises monotonously with their growth rates (Fig 3A). A correlation-based monotonousness score was defined to assess the tendency of declining upper bound or rising lower bound (Materials and Methods). The full criteria for target identification were summarized in Fig 3B. The requirement that most of the individualized models for NCI-60 cell lines locate close to the boundary is necessary to allow the metabolic perturbation to draw the flux configuration out of Pareto surface and confer significant impact on cell viability.

By analyzing the geometry of projected Pareto surface as we introduced above, we identified a list of targets essential for cancer cell growth and the Warburg Effect. The extent of the Warburg effect was quantified as the flux ratio of lactate secretion to glucose consumption. Interestingly, we found that most targets capable of reducing the Warburg effect need to be activated, whereas those able to suppress cell proliferation need to be inhibited (Table 1). Complete information about these identified targets is listed in Table S3. It has been noted that cell proliferation is a highly orchestrated process in which several pathways function in concert, producing

multiple metabolic precursors for biomass synthesis (illustrated as BP1, BP2 and BP3 in Fig 3C). Defects in these pathways would prevent cells from obtaining critical building blocks, and inhibiting key enzymes involved in these processes may suppress cell proliferation. On the other hand, the Warburg effect is largely controlled by lactate dehydrogenase (LDH) generating lactate from pyruvate, which diverts carbon flux away from oxidative glucose metabolism and other related pathways. Therefore, activation of enzymes capable of consuming carbon atoms other than glycolysis may compete with the LDH flux for glucose-derived carbon atoms, leading to the reduced Warburg effect.

By cross-comparing the key metabolic enzymes controlling cell proliferation and the Warburg effect, we found that enzymes whose inhibition is predicted to reduce cell proliferation overlap significantly with enzymes whose activation suppresses the Warburg effect (Fig 3D). Moreover, no versatile target was predicted to exist whose perturbation is able to inhibit both processes. This result seems to be contradictory to several previous studies(Le et al., 2010; Xie et al., 2014). However, it is worth mentioning that our modeling results only reflect the direct consequence of metabolic perturbation. Metabolic enzymes often carry essential non-metabolic functions, and inhibition of cell proliferation may lead to metabolic shifts secondary to growth arrest, which were not considered by our theoretical analysis. Nevertheless, the predicted enzymes whose expression are critical for cell proliferation and/or the Warburg effect may serve as a potential target pool for therapeutic intervention, if their expression significantly correlate with disease progression.

To validate the association between identified targets and cancer progression, we conducted Kaplan-Meier survival analysis on thousands of breast cancer patients to systematically evaluate the connection between these enzymes and patient survival (Gyorffy et al., 2010). We focus on the enzymes whose activation were predicted to reduce the Warburg effect and enzymes whose inhibition would inhibit proliferation, and classify all these targets into three categories (Fig 3D):

**C1:** Inhibition of these targets was predicted to inhibit cell proliferation while no association with the Warburg effect was predicted;

**C2:** Activation of these targets was predicted to suppress the Warburg effect while no association with cell proliferation was predicted;

**C3:** Inhibition of these targets was predicted to inhibit cell proliferation, and activation of them to suppress the Warburg effect.

C1 and C2 enzymes and their corresponding monotonousness scores are shown in Fig 3E and 3F.

For C1 enzymes, we predict that their higher expression associate with worse disease progression, thus correlating with poorer prognosis and higher risk of death (*i.e.* hazard ratio > 1 in Kaplan-Meier analysis). Similarly, higher expression of C2 enzymes are expected to associate with lower risk of death (hazard ratio < 1 in Kaplan-Meier analysis). The correlation between C3 enzymes and patient survival may not be significant, since their roles in regulating cell proliferation and the Warburg effect counteract with each other. Kaplan-Meier survival analyses strongly support these conclusions (Fig 3G-3I).

We further conducted Kaplan-Meier analyses of C1 and C2 enzymes using gene expression and clinical datasets for non-small-cell lung cancer(Gyorffy et al., 2013) and observed similar results (Fig S5). The consistency between model-predicted functions of C1 and C2 enzymes and their association with cancer prognosis implies that these two categories of enzymes are potential anti-tumor targets. Although it is still challenging, recent progress in designing enzymatic agonists(Cool et al., 2006; Meng et al., 2016) makes C2 targets potentially druggable in developing new cancer therapeutics. On the other hand, C1 enzymes are more likely to be feasible targets, since their down-regulation is associated with better prognosis.

Regarding C3 enzymes, their overexpression may suppress the Warburg effect, whereas their lower expression may inhibit cell proliferation. Interestingly, we found that the up-regulation of most C3 enzymes correlate with better patient prognosis, indicating that their roles in regulating the Warburg effect are more important during tumor progression (Fig 3I,S5C). To further test this idea, we constructed individualized models for 1101 invasive breast carcinoma (BRCA) tumors and 114 adjacent normal tissue samples based on their gene expression profiles in the Cancer Genome Atlas(Cancer Genome Atlas, 2012), and used them to predict the proliferation potential and extent of the Warburg effect of corresponding samples. Indeed, tumor samples were predicted to exhibit significantly higher glycolysis than normal tissue samples ( $p=1.34\times 10^{-41}$ , Wilcoxon's rank sum test, Fig 3K), whereas the biomass production fluxes of tumor samples were predicted to be lower (Wilcoxon's

rank sum test  $p=1.28\times 10^{-35}$ , Fig 3J). These results confirm that the Warburg effect, rather than rapid proliferation, is a more distinguished feature for malignant tumors, although targeting cell proliferation may still be considered as a therapeutic option, especially for early-staged cancers. Consistent with this notion, we observed the up-regulation of a large number of C1 enzymes (Fig 3L) and down-regulation of most C2 enzymes (Fig 3M) in tumor relative to normal tissue samples. Taken together, these integrated analyses of omics datasets validated the close association between model-predicted anti-tumor targets and cancer progression.

### **Ablation of C1 enzymes impairs cancer cell proliferation**

To further validate our modeling method, we focused on the top five C1 targets (Fig 3D) (Materials and Methods) and subjected four of them (RPIA, AHCY, PHGDH, and PSAT1) to experimental validation. PSPH was omitted because it catalyzes the very last reaction of serine anabolism (Locasale, 2013), thus is identical to PSAT1 as a target for our analysis. Most cell lines used in our experiments were selected from the NCI-60 panel, whereas some unavailable lines were replaced by alternatives with identical cancer types (Table S6). For each specific target, the top four cell lines with the largest growth reduction upon target inhibition as predicted by our model were selected for experimental validation, and HeLa was also included as a common cancer cell line. Efficiencies of gene ablations were validated by quantifying the mRNA levels using RT-PCR (Fig 4A-4D) and protein levels using Western blot (Fig S6). Indeed, knockdown of each individual target was associated with strong

anti-proliferative effects in almost all cell lines predicted to be sensitive for target inhibition (Fig 4E-4H).

### **Knockdown of C1 enzymes fail to inhibit the Warburg effect in cancer cells**

A key prediction of our theoretical model is that goals of inhibiting cell proliferation and the Warburg effect largely conflict with each other. In other words, there is few perturbation strategies on a single enzyme capable of inhibiting cell proliferation and the Warburg effect simultaneously. To validate this conclusion, we measured lactate secretion rates with or without C1 knockdown in cell lines whose proliferation rates exhibit significant reduction upon C1 ablation. Consistent with our model, lactate production rates were not reduced in these cell lines (Fig 5A-5D).

## Discussion

### **A multi-objective optimization model correctly predicts cancer cell responses to metabolic perturbation**

In this study, we developed a novel strategy to model metabolism based on the assumption of multi-objective optimization. Specifically, we applied the concept of Pareto optimality to predict flux configurations with optimality in balancing the maximization of yields (growth and energy) and minimization of costs (enzymes and nutrients). By integrating these metabolic objectives with multi-omics datasets, we were able to construct individualized models to correctly predict multiple phenotypes of cancer cells including cell growth rates and responses to metabolic perturbation. This is the first attempt, to our best knowledge, to incorporate multiple objectives in modeling cancer metabolism, which demonstrates that calculated deviations from Pareto optimality with different goals closely resemble impairments of cell viability.

In our current model, we selected 4 most commonly utilized metabolic objectives for FBA analysis, including maximization of biomass production, maximization of ATP hydrolysis, minimization of total abundance of metabolic enzymes, and minimization of total carbon uptake. Nevertheless, some other objectives may also be considered for quantifying the metabolic network, such as minimization of redox imbalance, maximization of resistance to cytotoxic agents, minimization of reactive oxygen species (ROS) production, etc. Incorporating additional objectives in our model may further improve the fitting accuracy of Pareto surfaces to the actual metabolic network under different circumstances. Strategies to

deduct the best combinations of objectives(Hart et al., 2015; Zhao et al., 2016) may be combined with our modeling method, and provide new insights in the reprogramming mechanism of cancer metabolism.

### **The landscape of Pareto surface implicates roles of metabolic enzymes in cancer progression**

Our theoretical model successfully dissects the cancer metabolic network and identifies its vulnerabilities from a global perspective. More specifically, we were able to determine several key metabolic targets to control cancer cell proliferation or the Warburg effect by analyzing the geometry of Pareto surface. Most of the potential targets associate with patient survival and exhibit differential expression patterns in cancer and normal tissues. Specifically, we identified 12 enzymes whose down-regulation exhibit strong inhibitory effects on cell proliferation yet no inhibitory impact on the Warburg effect (C1 enzymes). These enzymes are involved in multiple metabolic pathways including the Krebs cycle, oxidative phosphorylation, de novo serine synthesis, pentose phosphate pathway, and pyrimidine metabolism. Among these 12 enzymes, 11 were confirmed to correlate with cancer progression (Table 2), and some of them already have chemical inhibitors subjected to clinical tests. The clear enrichment of known anti-tumor targets in C1 enzymes, together with their significant association with patient survival, highlight the ability of Pareto optimality-based strategy in unraveling the metabolic vulnerabilities of cancer cells. Finally, we validated the top 4 C1 enzymes in human cancer cell lines with shRNA



knockdown, confirming that inhibition of these enzymes would significantly reduce cell growth rates but have no inhibitory effect on aerobic glycolysis. Taken together, our theoretical and experimental results suggest that roles of metabolic enzymes in cancer progression can be uncovered by analyzing the landscape of Pareto surface under the framework of four-objective optimization model.

### **The multi-objective optimization model sheds new light on designing anti-tumor therapeutics**

Our study also suggests a novel route to target cancer-specific metabolic abnormalities by activating metabolic enzymes to compete with the Warburg effect. Although suppressing the Warburg effect has been intensely studied as a promising cancer therapy, most related strategies focus on direct or indirect inhibition of enzymes associated with aerobic glycolysis. One example is PDK1, the inhibition of which would attenuate its inhibitory effect on PDH, and facilitate oxidative glucose metabolism (Galluzzi et al., 2013). Interestingly, PDH was predicted as a C1 enzyme by our model, due to the longer distance between the individualized models and the upper bound of projected Pareto surface for the Warburg effect, as compared to the distance between the NCI-60 models and lower bound for cell growth rate, suggesting that PDH is more likely to be rate-limiting for proliferation. Consistent with this prediction, PDH inhibition has been reported to suppress cell proliferation (Table 2). Except for PDH, our analysis also reveals the wide existence of enzymes whose activation may impair tumor development mainly by inhibiting the Warburg effect.

Compared to traditional methods that directly target glycolysis, this strategy may greatly reduce the side effects in normal cells that also use glucose as the major energy source. Therefore, this approach warrants further investigation even though efforts may be taken to generate enzymatic agonists.

Moreover, our model highlighted a contradictory role played by several metabolic enzymes in affecting cell growth and the Warburg effect. For a group of enzymes identified as potential targets for rapid proliferation, their activations were predicted to inhibit aerobic glycolysis (C3 enzymes in Figure 3D). The conflict between inhibiting cell proliferation and the Warburg effect reflects the intrinsic robustness of cancer as a complex disease, and was further supported by the fact that ablations of C1 enzymes failed to impair lactate production in most tested cancer cells. However, this could also be due to the fact that our modeling approach only considers the direct influence of metabolic perturbation, not the secondary effects derived from primary manipulations. In addition, our method only incorporated the stoichiometric constraints of metabolic fluxes, and ignored nonlinear factors such as the allosteric regulation of metabolic enzymes for modeling feasibilities. Further investigation is needed to characterize precise roles of those enzymes in cancer. Nevertheless, our study presented a comprehensive strategy to identify cancer-associated vulnerabilities with much-improved accuracies, as supported by survival analyses and cell-based experiments.

In summary, we have developed a novel method to model cancer metabolism based on Pareto optimality under the framework of multi-objective optimization. This

approach created an integrated workflow from omics-based mathematical model to metabolic target identification, and predicted metabolic hubs essential for cancer cell proliferation and/or the Warburg effect. The high consistency between predicted roles of metabolic enzymes in cancer and tumor ‘omics’ data suggests that the overall effect of a specific enzyme during tumor development is determined by its functions in multiple metabolic tasks rather than a single task such as cell proliferation. In addition to modeling cancer metabolism, this methodology may also be applied to explore other disease-related metabolic abnormalities with accessible omics datasets.

## **Materials and Methods**

### **Defining metabolic objectives in the genome-scale metabolic model**

We considered four metabolic objectives including maximization of biomass production flux ( $f_{\text{BM}}$ ), maximization of ATP turnover ( $f_{\text{ATP}}$ ), minimization of carbon uptake (CU), and minimization of total metabolic enzyme abundance (EA). The genome-scale metabolic model used here, Recon 1, already contains a biomass producing flux whose coefficients are determined by the molecular composition of mammalian cells. We employed a curated and decomposed model by Shlomi *et al* (i.e. all reversible reactions are decomposed into forward and backward reactions) to simplify the following procedures, but this model lacks some critical fluxes and biomass components. Therefore, we downloaded model files in the SBML format from the BioModels Database, translated them into MATLAB files using COBRA, and supplemented the original model with ignored components for the following

analysis. The MATLAB file of updated model has been included in the Supplementary Materials (Data S1). This model also contains an ATP hydrolysis flux, whose maximization was considered as the second objective. Eventually the carbon uptake (CU) flux was calculated as follows:

$$CU = \sum_{i=1}^n n_{C,i} f_i$$

$n$  is number of fluxes in the model,  $n_{C,i}$  is the number of carbon atoms imported into intracellular compartments by the  $i$ th flux and  $f_i$  is its flux rate. If this flux does not lead to any carbon uptake, the value of  $n_{C,i}$  is zero.

The enzyme abundance (EA) was determined by:

$$EA = \sum_{i=1}^n \frac{W_i}{K_{cat,i}} f_i$$

Since the coefficients  $\frac{W_i}{K_{cat,i}}$  have already been evaluated in the curated model with a solvent capacity constraint, they were simply utilized in our analysis. In other words, the solvent capacity constraint has been replaced by the objective of minimizing total enzyme abundance. Upper limits of nutrient influxes were set according to the composition of RPMI-1640 medium (Table S2).

### **Sampling the Pareto surface with the Branched $\epsilon$ -Constraint Method (BECM)**

Pareto solutions of optimization problems with  $N$  objectives can be calculated by  $\epsilon$ -Constraint Method, in which  $N-1$  of the objectives are transformed into soft constraints and the left single objective can be optimized with the resultant constraints.

Assume that we are interested in solving the following problem:

$$\max(f_1(\mathbf{x}), f_2(\mathbf{x}), \dots, f_N(\mathbf{x}))$$

$$\text{s. t. } \mathbf{S} \cdot \mathbf{x} = \mathbf{0}, \quad \mathbf{0} \leq \mathbf{x} \leq \mathbf{ub}$$

In which  $\mathbf{S}$  is the stoichiometric matrix,  $\mathbf{x}$  is the flux configuration in which each element is flux rate of a reaction,  $\mathbf{ub}$  is the vector of maximal rates of reactions. Assume that  $f_1(\mathbf{x})$  is the objective to be optimized and all other objectives are treated as constraints, the derived single objective optimization problem (SOOP) becomes:

$$\begin{aligned} & \max f_1(\mathbf{x}), \quad \text{s. t.} \\ & \left\{ \begin{array}{l} f_2(\mathbf{x}) \geq e_2 \\ f_3(\mathbf{x}) \geq e_3 \\ \dots \\ f_N(\mathbf{x}) \geq e_N \\ \mathbf{S} \cdot \mathbf{x} = \mathbf{0}, \mathbf{0} \leq \mathbf{x} \leq \mathbf{ub} \end{array} \right. \end{aligned}$$

By transforming different combinations of objectives to constraints, adjusting the constants  $e_1$  to  $e_n$ , and repeatedly solving the corresponding optimization problem, we can obtain a solution set with Pareto optimality. In our model all objectives and constraints are linear, enabling us to solve the SOOPs with efficient algorithms (e.g. simplex method, interior point method, etc) for linear programming (LP). The LP problems were solved using Mosek (<http://www.mosek.com/>).

To generate feasible SOOPs more efficiently, we employed a branched strategy. First we calculate the maximal values for the biomass production flux ( $f_{Biomass}^{max}$ ) and the ATP hydrolysis flux ( $f_{ATP}^{max}$ ). We then sampled 10000 combinations of  $(e_{Biomass}, e_{ATP})$  in the region  $[0, f_{Biomass}^{max}] \times [0, f_{ATP}^{max}]$  with Latin Hypercube Sampling. For each combination we calculated the minimal values of CU and EA ( $CU_{min}$  and  $EA_{min}$ ) compatible with constraints in the GSMM,  $f_{Biomass} \geq e_{Biomass}$  and  $f_{ATP} \geq e_{ATP}$ . Let  $CU_{max}$  and  $EA_{max}$  denote the value of CU when EA reaches

its lowest limit, and the value of EA when CU reaches its lowest limit. Calculating the range of  $[CU_{min}, CU_{max}]$  and  $[EA_{min}, EA_{max}]$  according to sampled  $(e_{Biomass}, e_{ATP})$  prior to SOOP generation helps to avoid generating a large number of infeasible SOOPs. We finally generated SOOPs in a branched manner in which stratified sampling were applied to select  $m_1$  values within  $[CU_{min}, CU_{max}]$  and  $m_2$  values within  $[EA_{min}, EA_{max}]$ .  $m_1 + m_2$  SOOPs were generated according to  $m_1$  minimizing EA and  $m_2$  minimizing CU. The values of  $m_1$  and  $m_2$  were determined by the range of  $[CU_{min}, CU_{max}]$  and  $[EA_{min}, EA_{max}]$  with 10 as the maximal value. Possible solutions of all feasible SOOPs (42930 in total) were summed up as the sampled Pareto surface.

### **Retrieving and processing the omics datasets**

Proteomics data of the NCI-60 cell lines are available at the NCI-60 Proteome Resource: <http://wzw.tum.de/proteomics/nci60>. The exchange flux rates of these cell lines were presented in a study at 2012(Jain et al., 2012). However, these proteomics and fluxomics data were only normalized by cell numbers, and NCI-60 cell lines were noted to exhibit different cell sizes. Therefore, we further normalized the original data by cell volumes calculated based on cell diameters available at: <http://www.nexcelom.com/Applications/Cancer-Cells.html>, with the assumption that single cells are perfect spheres. Expression levels of metabolic enzymes were evaluated by gene-protein-reaction rules included in the GSMM (Details in Supplementary Materials). Gene scores quantifying sensitivities to gene knockdown

are available at: <http://www.broadinstitute.org/achilles>. Cell growth rates are available at: <http://discover.nci.nih.gov/cellminer/>. The TCGA datasets for breast cancer are available at the Cancer Genome Browser (<https://genome-cancer.ucsc.edu>)(Zhu et al., 2009). Kaplan-Meier survival analyses were performed using the Kaplan-Meier Plotter (<http://kmplot.com/analysis/>)(Szasz et al., 2016).

### Constructing the individualized models

We defined a similarity score to evaluate to which extent the distribution of flux configurations as predicted by the individualized models can reproduce the distribution of corresponding omics data. The similarity metric (S) is comprised of two parts:  $S_1$  and  $S_2$ .  $S_1$  is the summation of correlation coefficients between model-predicted and experimentally-determined exchange flux rates:

$$S_1 = \sum_{i=1}^{n_{\text{exc}}} \text{Corr}[(x_{1,i}^{\text{exp}}, x_{2,i}^{\text{exp}}, \dots, x_{n,i}^{\text{exp}}), (x_{1,i}^{\text{model}}, x_{2,i}^{\text{model}}, \dots, x_{n,i}^{\text{model}})]$$

$S_2$  is the summation of correlation coefficients between model-predicted average flux rates and average expression levels of metabolic pathways:

$$S_2 = \sum_{i=1}^{n_p} \text{Corr}[(e_{1,i}^{\text{exp}}, e_{2,i}^{\text{exp}}, \dots, e_{n,i}^{\text{exp}}), (x_{1,i}^{\text{model}}, x_{2,i}^{\text{model}}, \dots, x_{n,i}^{\text{model}})]$$

$n_{\text{exc}}$  is the number of exchange fluxes whose measurements were available,  $n_p$  is the number of metabolic pathways in the KEGG Database,  $n$  is the number of NCI-60 cell lines whose fluxomics and proteomics data are both available,  $(x_{1,i}^{\text{exp}}, x_{2,i}^{\text{exp}}, \dots, x_{n,i}^{\text{exp}})$  is the experimentally-determined flux rates of cell lines for the  $i$ th exchange flux,  $(e_{1,i}^{\text{exp}}, e_{2,i}^{\text{exp}}, \dots, e_{n,i}^{\text{exp}})$  is the average expression levels of metabolic enzymes for the  $i$ th pathway according to proteomics data,

$(x_{1,i}^{\text{model}}, x_{2,i}^{\text{model}}, \dots, x_{n,i}^{\text{model}})$  is the flux rates predicted by our models (individual fluxes in  $S_1$  and pathway-averaged fluxes in  $S_2$ ). The correlation metric used here is Spearman's rank correlation coefficients. Single enzymes were mapped to metabolic pathways according to the BRENDA Database based on their EC Numbers. The individualized models (i.e. flux configurations for the cell lines) were constructed along the approximate Pareto surface by maximizing the similarity metric  $S$  with simulated annealing. For the TCGA datasets in which no flux rates are available, the similarity score  $S_2$  was maximized alone.

### **Simulation of metabolic gene ablations and calculation of the Pareto deviation score**

We simulated the effects of metabolic gene knockdowns with minimization of metabolic adjustments (MOMA)(Segre et al., 2002). First we assumed that all metabolic genes have equal expression levels of 1 and evaluate the expression levels of all enzymes contained in the GSMM. We then changed the expression level of to-be-ablated gene to zero and re-evaluated this enzyme. For all reactions associated with enzymes whose expression levels change in this process, let  $E_0$  and  $E_1$  denote the evaluated expression levels of the corresponding enzyme before and after the knockdown, respectively. After that, we adjusted the upper bound of flux through this reaction by multiplying itself with  $E_1/E_0$ . Finally, the new flux configuration  $\mathbf{x}_1$  after gene knockdown was calculated by minimizing the Euclidean distance to the original flux configuration  $\mathbf{x}_0$  with the new upper bound constraints. Pareto



deviation score (PDS) was then computed as below:

$$PDS = \min_{\mathbf{x} \in PS} \| (f_{BM}(\mathbf{x}), f_{ATP}(\mathbf{x}), CU(\mathbf{x}), EA(\mathbf{x})) - (f_{BM}(\mathbf{x}_1), f_{ATP}(\mathbf{x}_1), CU(\mathbf{x}_1), EA(\mathbf{x}_1)) \|$$

### Analyzing the projected Pareto surface

Briefly, the upper and lower bounds of projected Pareto surface were approximated by mathematical discretization. Ranges of cell growth rate or the Warburg effect (defined as the ratio of lactate secretion flux to glucose uptake flux) of all Pareto solutions were divided into 100 bins with identical size. Let  $f_i$  denote the variable describing the  $i$ th flux used in combination with cell growth rate or the Warburg effect for the projection, the lower and upper bounds of  $f_i$  in all Pareto solutions whose growth rates or the Warburg effect fell in each of the 100 bins were calculated as  $[LB_1, LB_2, \dots, LB_{100}]$  and  $[UB_1, UB_2, \dots, UB_{100}]$ . The tendency of these bounds to be monotonous (increasing or decreasing) were quantified by Spearman's rank correlation coefficients between the vector  $[LB_1, LB_2, \dots, LB_{100}]$  or  $[UB_1, UB_2, \dots, UB_{100}]$  and the vector  $[1, 2, 3, \dots, 100]$ . We refer to these correlation coefficients as monotonousness scores (Table S5). Bounds were considered as monotonously decreasing if correlation coefficients were less than -0.9, and monotonously increasing if larger than 0.9. If a projection has decreasing upper bound and more than half of the individualized models for NCI-60 cell lines are located closer to the upper bound than to the lower bound, the enzyme catalyzing the flux used for projection would be identified as a potential target to be activated.

Conversely, increasing lower bound to which more than half of the individualized models are located closer would identify a potential target to be inhibited.

### **Experimental validation of identified metabolic targets**

Cell lines were selected from the NCI-60 panel based on their predicted changes of biomass production flux using the NCI-60 individualized models as previously constructed. The simulation of enzymatic perturbations was performed by MOMA. Cell lines predicted to have significant reduction of biomass production flux were selected for further experimental validation.

**Cell Culture.** BT549, MDA\_MB\_231, A549, U87, SW\_620, COLO205, and RPMI\_8226 cell lines were purchased from the China Infrastructure of Cell Line Resources and cultured in RPMI containing 10% FBS and antibiotics. Purchased U251 and HeLa cells were cultured in DMEM containing 10% FBS. All cell lines were confirmed to be mycoplasma negative. shRNA constructs were transfected into cells using Lipofectamine and selected with corresponding antibiotics.

**Immunoblot Analysis.** Cells were lysed with lysis buffer (25 mM Tris, 100 mM NaCl, 1% Triton X-100, 1 mM EDTA, 1 mM DTT, 1 mM NaVO<sub>4</sub>, 1 mM β-glycerol phosphate, and 1 mg/mL aprotinin), and then the lysates were resolved by SDS-PAGE and proteins transferred to PDVF membranes. The filters were incubated with various primary antibodies diluted in TBST (20 mM Tris, 135 mM NaCl, and 0.02% Tween 20). The primary antibodies were detected with horseradish peroxidase-conjugated secondary antibodies followed by exposure to ECL reagent.

**Cell growth and metabolic assays.** Cells were plated in dishes at a density of  $5 \times 10^4$  cells/dish and cultured in low serum medium for 5 consecutive days. Every other day one set of cells was collected and counted, while the medium on the remaining sets of cells was replenished. The rates of lactate production were determined using a BioProfile basic biochemistry analyzer (Nova Biomedical).

**Statistical analysis.** Statistical tests were performed using MATLAB. Algorithms for sampling the Pareto surface, constructing individualized models, and identifying targets were implemented in MATLAB codes.

## **Acknowledgement**

This study was supported in part by the Ministry of Science and Technology (2016YFA0502303 and 2015CB910300 to LL), the National Natural Science Foundation of China (21633001 to LL, 81572508 to BL) and the Fundamental Research Funds for the Sun Yat-sen University (16ykzd04 to BL). ZD thanks Dr. Ning Yin for helpful discussions and insightful comments on the manuscript and Dr. Chunmei Li for help with the cancer cell lines.

## **References**

- Agren, R., Mardinoglu, A., Asplund, A., Kampf, C., Uhlen, M., and Nielsen, J. (2014). Identification of anticancer drugs for hepatocellular carcinoma through personalized genome-scale metabolic modeling. *Mol Syst Biol* *10*, 721.
- Boroughs, L.K., and DeBerardinis, R.J. (2015). Metabolic pathways promoting cancer cell survival and growth. *Nat Cell Biol* *17*, 351-359.
- Cancer Genome Atlas, N. (2012). Comprehensive molecular portraits of human breast tumours. *Nature* *490*, 61-70.
- Cheong, H., Lu, C., Lindsten, T., and Thompson, C.B. (2012). Therapeutic targets in cancer cell metabolism and autophagy. *Nat Biotechnol* *30*, 671-678.

- Ciou, S.C., Chou, Y.T., Liu, Y.L., Nieh, Y.C., Lu, J.W., Huang, S.F., Chou, Y.T., Cheng, L.H., Lo, J.F., Chen, M.J., *et al.* (2015). Ribose-5-phosphate isomerase A regulates hepatocarcinogenesis via PP2A and ERK signaling. *Int J Cancer* *137*, 104-115.
- Cool, B., Zinker, B., Chiou, W., Kifle, L., Cao, N., Perham, M., Dickinson, R., Adler, A., Gagne, G., Iyengar, R., *et al.* (2006). Identification and characterization of a small molecule AMPK activator that treats key components of type 2 diabetes and the metabolic syndrome. *Cell Metab* *3*, 403-416.
- Cowley, G.S., Weir, B.A., Vazquez, F., Tamayo, P., Scott, J.A., Rusin, S., East-Seletsky, A., Ali, L.D., Gerath, W.F., Pantel, S.E., *et al.* (2014). Parallel genome-scale loss of function screens in 216 cancer cell lines for the identification of context-specific genetic dependencies. *Sci Data* *1*, 140035.
- Dai, Z., Shestov, A.A., Lai, L., and Locasale, J.W. (2016). A Flux Balance of Glucose Metabolism Clarifies the Requirements of the Warburg Effect. *Biophys J* *111*, 1088-1100.
- DeBerardinis, R.J., and Chandel, N.S. (2016). Fundamentals of cancer metabolism. *Sci Adv* *2*, e1600200.
- Duarte, N.C., Becker, S.A., Jamshidi, N., Thiele, I., Mo, M.L., Vo, T.D., Srivas, R., and Palsson, B.O. (2007). Global reconstruction of the human metabolic network based on genomic and bibliomic data. *Proc Natl Acad Sci U S A* *104*, 1777-1782.
- Folger, O., Jerby, L., Frezza, C., Gottlieb, E., Ruppin, E., and Shlomi, T. (2011). Predicting selective drug targets in cancer through metabolic networks. *Mol Syst Biol* *7*, 501.
- Frezza, C., Zheng, L., Folger, O., Rajagopalan, K.N., MacKenzie, E.D., Jerby, L., Micaroni, M., Chaneton, B., Adam, J., Hedley, A., *et al.* (2011). Haem oxygenase is synthetically lethal with the tumour suppressor fumarate hydratase. *Nature* *477*, 225-228.
- Galluzzi, L., Kepp, O., Vander Heiden, M.G., and Kroemer, G. (2013). Metabolic targets for cancer therapy. *Nat Rev Drug Discov* *12*, 829-846.
- Gatenby, R.A., and Gillies, R.J. (2004). Why do cancers have high aerobic glycolysis? *Nat Rev Cancer* *4*, 891-899.
- Gatto, F., Miess, H., Schulze, A., and Nielsen, J. (2015). Flux balance analysis predicts essential genes in clear cell renal cell carcinoma metabolism. *Sci Rep* *5*, 10738.
- Gholami, A.M., Hahne, H., Wu, Z., Auer, F.J., Meng, C., Wilhelm, M., and Kuster, B. (2013). Global proteome analysis of the NCI-60 cell line panel. *Cell Rep* *4*, 609-620.
- Gianchandani, E.P., Oberhardt, M.A., Burgard, A.P., Maranas, C.D., and Papin, J.A. (2008). Predicting biological system objectives de novo from internal state measurements. *BMC Bioinformatics* *9*, 43.
- Goh, W.Q., Ow, G.S., Kuznetsov, V.A., Chong, S., and Lim, Y.P. (2015). DLAT subunit of the pyruvate dehydrogenase complex is upregulated in gastric cancer-implications in cancer therapy. *Am J Transl Res* *7*, 1140-1151.
- Gyorffy, B., Lanczky, A., Eklund, A.C., Denkert, C., Budczies, J., Li, Q., and Szallasi, Z. (2010). An online survival analysis tool to rapidly assess the effect of 22,277 genes on breast cancer prognosis using microarray data of 1,809 patients. *Breast Cancer Res Treat* *123*, 725-731.
- Gyorffy, B., Surowiak, P., Budczies, J., and Lanczky, A. (2013). Online survival analysis software to assess the prognostic value of biomarkers using transcriptomic data in non-small-cell lung cancer. *PLoS One* *8*, e82241.
- Hanahan, D., and Weinberg, R.A. (2011). Hallmarks of cancer: the next generation. *Cell* *144*, 646-674.
- Hart, Y., Sheftel, H., Hausser, J., Szekely, P., Ben-Moshe, N.B., Korem, Y., Tandler, A., Mayo, A.E., and Alon, U. (2015). Inferring biological tasks using Pareto analysis of high-dimensional data. *Nat Methods* *12*, 233-235, 233 p following 235.

- Jain, M., Nilsson, R., Sharma, S., Madhusudhan, N., Kitami, T., Souza, A.L., Kafri, R., Kirschner, M.W., Clish, C.B., and Mootha, V.K. (2012). Metabolite profiling identifies a key role for glycine in rapid cancer cell proliferation. *Science* *336*, 1040-1044.
- Knorr, A.L., Jain, R., and Srivastava, R. (2007). Bayesian-based selection of metabolic objective functions. *Bioinformatics* *23*, 351-357.
- Le, A., Cooper, C.R., Gouw, A.M., Dinavahi, R., Maitra, A., Deck, L.M., Royer, R.E., Vander Jagt, D.L., Semenza, G.L., and Dang, C.V. (2010). Inhibition of lactate dehydrogenase A induces oxidative stress and inhibits tumor progression. *Proc Natl Acad Sci U S A* *107*, 2037-2042.
- Lee, K.C., Shorr, R., Rodriguez, R., Maturo, C., Boteju, L.W., and Sheldon, A. (2011). Formation and anti-tumor activity of uncommon in vitro and in vivo metabolites of CPI-613, a novel anti-tumor compound that selectively alters tumor energy metabolism. *Drug Metab Lett* *5*, 163-182.
- Liberti, M.V., and Locasale, J.W. (2016). The Warburg Effect: How Does it Benefit Cancer Cells? *Trends Biochem Sci* *41*, 211-218.
- Liu, X., Romero, I.L., Litchfield, L.M., Lengyel, E., and Locasale, J.W. (2016). Metformin Targets Central Carbon Metabolism and Reveals Mitochondrial Requirements in Human Cancers. *Cell Metab* *24*, 728-739.
- Locasale, J.W. (2013). Serine, glycine and one-carbon units: cancer metabolism in full circle. *Nat Rev Cancer* *13*, 572-583.
- Locasale, J.W., Grassian, A.R., Melman, T., Lyssiotis, C.A., Mattaini, K.R., Bass, A.J., Heffron, G., Metallo, C.M., Muranen, T., Sharfi, H., *et al.* (2011). Phosphoglycerate dehydrogenase diverts glycolytic flux and contributes to oncogenesis. *Nat Genet* *43*, 869-874.
- Martinez-Outschoorn, U.E., Peiris-Pages, M., Pestell, R.G., Sotgia, F., and Lisanti, M.P. (2017). Cancer metabolism: a therapeutic perspective. *Nat Rev Clin Oncol* *14*, 113.
- Mavrotas, G. (2009). Effective implementation of the  $\epsilon$ -constraint method in Multi-Objective Mathematical Programming problems. *Applied Mathematics and Computation* *213*, 455-465.
- Megchelenbrink, W., Katzir, R., Lu, X., Ruppin, E., and Notebaart, R.A. (2015). Synthetic dosage lethality in the human metabolic network is highly predictive of tumor growth and cancer patient survival. *Proc Natl Acad Sci U S A* *112*, 12217-12222.
- Meng, H., McClendon, C.L., Dai, Z., Li, K., Zhang, X., He, S., Shang, E., Liu, Y., and Lai, L. (2016). Discovery of Novel 15-Lipoxygenase Activators To Shift the Human Arachidonic Acid Metabolic Network toward Inflammation Resolution. *J Med Chem* *59*, 4202-4209.
- Mullarky, E., Lucki, N.C., Beheshti Zavareh, R., Anglin, J.L., Gomes, A.P., Nicolay, B.N., Wong, J.C., Christen, S., Takahashi, H., Singh, P.K., *et al.* (2016). Identification of a small molecule inhibitor of 3-phosphoglycerate dehydrogenase to target serine biosynthesis in cancers. *Proc Natl Acad Sci U S A* *113*, 1778-1783.
- Orth, J.D., Thiele, I., and Palsson, B.O. (2010). What is flux balance analysis? *Nat Biotechnol* *28*, 245-248.
- Pacold, M.E., Brimacombe, K.R., Chan, S.H., Rohde, J.M., Lewis, C.A., Swier, L.J., Possemato, R., Chen, W.W., Sullivan, L.B., Fiske, B.P., *et al.* (2016). A PHGDH inhibitor reveals coordination of serine synthesis and one-carbon unit fate. *Nat Chem Biol* *12*, 452-458.
- Pardee, T.S., Lee, K., Luddy, J., Maturo, C., Rodriguez, R., Isom, S., Miller, L.D., Stadelman, K.M., Levitan, D., Hurd, D., *et al.* (2014). A phase I study of the first-in-class antimetabolic agent, CPI-613, in patients with advanced hematologic malignancies. *Clin Cancer Res* *20*, 5255-5264.
- Pavlova, N.N., and Thompson, C.B. (2016). The Emerging Hallmarks of Cancer Metabolism. *Cell*

Metab 23, 27-47.

Pfeiffer, T., Schuster, S., and Bonhoeffer, S. (2001). Cooperation and competition in the evolution of ATP-producing pathways. *Science* 292, 504-507.

Possemato, R., Marks, K.M., Shaul, Y.D., Pacold, M.E., Kim, D., Birsoy, K., Sethumadhavan, S., Woo, H.K., Jang, H.G., Jha, A.K., *et al.* (2011). Functional genomics reveal that the serine synthesis pathway is essential in breast cancer. *Nature* 476, 346-350.

Qiu, Z., Guo, W., Wang, Q., Chen, Z., Huang, S., Zhao, F., Yao, M., Zhao, Y., and He, X. (2015). MicroRNA-124 reduces the pentose phosphate pathway and proliferation by targeting PRPS1 and RPIA mRNAs in human colorectal cancer cells. *Gastroenterology* 149, 1587-1598 e1511.

Rabinovich, S., Adler, L., Yizhak, K., Sarver, A., Silberman, A., Agron, S., Stettner, N., Sun, Q., Brandis, A., Helbling, D., *et al.* (2015). Diversion of aspartate in ASS1-deficient tumours fosters de novo pyrimidine synthesis. *Nature* 527, 379-383.

Rohlena, J., Dong, L.F., Ralph, S.J., and Neuzil, J. (2011). Anticancer drugs targeting the mitochondrial electron transport chain. *Antioxid Redox Signal* 15, 2951-2974.

Savinell, J.M., and Palsson, B.O. (1992). Network analysis of intermediary metabolism using linear optimization. I. Development of mathematical formalism. *J Theor Biol* 154, 421-454.

Sborov, D.W., Haverkos, B.M., and Harris, P.J. (2015). Investigational cancer drugs targeting cell metabolism in clinical development. *Expert Opin Investig Drugs* 24, 79-94.

Schuetz, R., Kuepfer, L., and Sauer, U. (2007). Systematic evaluation of objective functions for predicting intracellular fluxes in *Escherichia coli*. *Mol Syst Biol* 3, 119.

Schuetz, R., Zamboni, N., Zampieri, M., Heinemann, M., and Sauer, U. (2012). Multidimensional optimality of microbial metabolism. *Science* 336, 601-604.

Segre, D., Vitkup, D., and Church, G.M. (2002). Analysis of optimality in natural and perturbed metabolic networks. *Proc Natl Acad Sci U S A* 99, 15112-15117.

Shaked, I., Oberhardt, M.A., Atias, N., Sharan, R., and Ruppín, E. (2016). Metabolic Network Prediction of Drug Side Effects. *Cell Syst* 2, 209-213.

Shlomi, T., Benyamini, T., Gottlieb, E., Sharan, R., and Ruppín, E. (2011). Genome-scale metabolic modeling elucidates the role of proliferative adaptation in causing the Warburg effect. *PLoS Comput Biol* 7, e1002018.

Sun, C.F., Haven, T.R., Wu, T.L., Tsao, K.C., and Wu, J.T. (2002). Serum total homocysteine increases with the rapid proliferation rate of tumor cells and decline upon cell death: a potential new tumor marker. *Clin Chim Acta* 321, 55-62.

Sun, L., Song, L., Wan, Q., Wu, G., Li, X., Wang, Y., Wang, J., Liu, Z., Zhong, X., He, X., *et al.* (2015). cMyc-mediated activation of serine biosynthesis pathway is critical for cancer progression under nutrient deprivation conditions. *Cell Res* 25, 429-444.

Szasz, A.M., Lanczky, A., Nagy, A., Forster, S., Hark, K., Green, J.E., Boussioutas, A., Busuttill, R., Szabo, A., and Gyorffy, B. (2016). Cross-validation of survival associated biomarkers in gastric cancer using transcriptomic data of 1,065 patients. *Oncotarget* 7, 49322-49333.

Tardito, S., Oudin, A., Ahmed, S.U., Fack, F., Keunen, O., Zheng, L., Miletic, H., Sakariassen, P.O., Weinstock, A., Wagner, A., *et al.* (2015). Glutamine synthetase activity fuels nucleotide biosynthesis and supports growth of glutamine-restricted glioblastoma. *Nat Cell Biol* 17, 1556-1568.

Thiele, I., and Palsson, B.O. (2010). A protocol for generating a high-quality genome-scale metabolic reconstruction. *Nat Protoc* 5, 93-121.

Thiele, I., Swainston, N., Fleming, R.M., Hoppe, A., Sahoo, S., Aurich, M.K., Haraldsdottir, H., Mo,

- M.L., Rolfsson, O., Stobbe, M.D., *et al.* (2013). A community-driven global reconstruction of human metabolism. *Nat Biotechnol* *31*, 419-425.
- Vander Heiden, M.G. (2011). Targeting cancer metabolism: a therapeutic window opens. *Nat Rev Drug Discov* *10*, 671-684.
- Vazquez, A., Liu, J., Zhou, Y., and Oltvai, Z.N. (2010). Catabolic efficiency of aerobic glycolysis: the Warburg effect revisited. *BMC Syst Biol* *4*, 58.
- Vernieri, C., Casola, S., Foiani, M., Pietrantonio, F., de Braud, F., and Longo, V. (2016). Targeting Cancer Metabolism: Dietary and Pharmacologic Interventions. *Cancer Discov* *6*, 1315-1333.
- Vie, N., Copois, V., Bascoul-Mollevi, C., Denis, V., Bec, N., Robert, B., Fraslou, C., Conseiller, E., Molina, F., Larroque, C., *et al.* (2008). Overexpression of phosphoserine aminotransferase PSAT1 stimulates cell growth and increases chemoresistance of colon cancer cells. *Mol Cancer* *7*, 14.
- Wang, Q., Liberti, M.V., Liu, P., Deng, X., Liu, Y., Locasale, J.W., and Lai, L. (2017). Rational Design of Selective Allosteric Inhibitors of PHGDH and Serine Synthesis with Anti-tumor Activity. *Cell Chem Biol* *24*, 55-65.
- Warburg, O. (1956). On the origin of cancer cells. *Science* *123*, 309-314.
- Wheaton, W.W., Weinberg, S.E., Hamanaka, R.B., Soberanes, S., Sullivan, L.B., Anso, E., Glasauer, A., Dufour, E., Mutlu, G.M., Budigner, G.S., *et al.* (2014). Metformin inhibits mitochondrial complex I of cancer cells to reduce tumorigenesis. *Elife* *3*, e02242.
- Wu, L.L., and Wu, J.T. (2002). Hyperhomocysteinemia is a risk factor for cancer and a new potential tumor marker. *Clin Chim Acta* *322*, 21-28.
- Xie, H., Hanai, J., Ren, J.G., Kats, L., Burgess, K., Bhargava, P., Signoretti, S., Billiard, J., Duffy, K.J., Grant, A., *et al.* (2014). Targeting lactate dehydrogenase--a inhibits tumorigenesis and tumor progression in mouse models of lung cancer and impacts tumor-initiating cells. *Cell Metab* *19*, 795-809.
- Yan, S., Jiang, H., Fang, S., Yin, F., Wang, Z., Jia, Y., Sun, X., Wu, S., Jiang, T., and Mao, A. (2015). MicroRNA-340 Inhibits Esophageal Cancer Cell Growth and Invasion by Targeting Phosphoserine Aminotransferase 1. *Cell Physiol Biochem* *37*, 375-386.
- Yizhak, K., Chaneton, B., Gottlieb, E., and Ruppin, E. (2015). Modeling cancer metabolism on a genome scale. *Mol Syst Biol* *11*, 817.
- Yizhak, K., Gaude, E., Le Devedec, S., Waldman, Y.Y., Stein, G.Y., van de Water, B., Frezza, C., and Ruppin, E. (2014a). Phenotype-based cell-specific metabolic modeling reveals metabolic liabilities of cancer. *Elife* *3*.
- Yizhak, K., Le Devedec, S.E., Rogkoti, V.M., Baenke, F., de Boer, V.C., Frezza, C., Schulze, A., van de Water, B., and Ruppin, E. (2014b). A computational study of the Warburg effect identifies metabolic targets inhibiting cancer migration. *Mol Syst Biol* *10*, 744.
- Zachar, Z., Marecek, J., Maturo, C., Gupta, S., Stuart, S.D., Howell, K., Schauble, A., Lem, J., Piramzadian, A., Karnik, S., *et al.* (2011). Non-redox-active lipoate derivatives disrupt cancer cell mitochondrial metabolism and are potent anticancer agents in vivo. *J Mol Med (Berl)* *89*, 1137-1148.
- Zhao, Q., Stettner, A.I., Reznik, E., Paschalidis, I., and Segre, D. (2016). Mapping the landscape of metabolic goals of a cell. *Genome Biol* *17*, 109.
- Zhu, J., Sanborn, J.Z., Benz, S., Szeto, C., Hsu, F., Kuhn, R.M., Karolchik, D., Archie, J., Lenburg, M.E., Esserman, L.J., *et al.* (2009). The UCSC Cancer Genomics Browser. *Nat Methods* *6*, 239-240.





**Table 1.** Numbers of identified targets

|                                   | <b>Targets to be activated</b> | <b>Targets to be inhibited</b> |
|-----------------------------------|--------------------------------|--------------------------------|
| <b>Inhibit cell proliferation</b> | 10                             | 79                             |
| <b>Inhibit the Warburg effect</b> | 71                             | 1                              |
| <b>Inhibit both</b>               | 0                              | 0                              |

**Table 2.** Summary of C1 enzymes

\*Drugs in bold are commercially available for cancer treatment.

| <b>Enzyme</b>                             | <b>Metabolic Pathway</b>           | <b>Inhibitors</b>                                                                                                                                                 | <b>Association with cancer</b>                                                                            |
|-------------------------------------------|------------------------------------|-------------------------------------------------------------------------------------------------------------------------------------------------------------------|-----------------------------------------------------------------------------------------------------------|
| <b>AHCY</b>                               | Cysteine and methionine metabolism |                                                                                                                                                                   | Its enzymatic product, L-homocysteine, is a marker of multiple cancers(Sun et al., 2002; Wu and Wu, 2002) |
| <b>NADH dehydrogenase (ETC Complex I)</b> | Oxidative phosphorylation          | <b>Tamoxifen(Rohlena et al., 2011)</b><br><b>Deguelin(Rohlena et al., 2011)</b><br><b>Metformin(Liu et al., 2016; Rohlena et al., 2011; Wheaton et al., 2014)</b> |                                                                                                           |
| <b>ubiquinol-6 cytochrome c reductase</b> | Oxidative phosphorylation          | <b>Adaphostin(Rohlena et al., 2011)</b><br><b>Resveratrol(Rohlena et</b>                                                                                          |                                                                                                           |

---

|                                              |                               |                                                                                                                                                                                                   |                                                           |
|----------------------------------------------|-------------------------------|---------------------------------------------------------------------------------------------------------------------------------------------------------------------------------------------------|-----------------------------------------------------------|
| <b>(ETC Complex III)</b>                     |                               | <b>al., 2011)</b><br>Xanthohumol(Rohlena et al., 2011)<br>Benzyl Isothiocyanate(Rohlena et al., 2011)<br>Lamellarin D(Rohlena et al., 2011)<br>PM031379(Rohlena et al., 2011)                     |                                                           |
| <b>cytochrome c oxidase (ETC Complex IV)</b> | Oxidative phosphorylation     | Porphyrin photosensitizers(Rohlena et al., 2011)<br>Fenretinid(Rohlena et al., 2011)                                                                                                              |                                                           |
| <b>ATP synthase (ETC Complex V)</b>          | Oxidative phosphorylation     | Piceatannol(Rohlena et al., 2011)<br><b>DIM(Rohlena et al., 2011)</b><br><b>Bz-423(Rohlena et al., 2011)</b><br><b>Rhodamine 123(Rohlena et al., 2011)</b><br><b>MK-077(Rohlena et al., 2011)</b> |                                                           |
| <b>PDH</b>                                   | Glycolysis, TCA cycle         | <b>CPI-613(Lee et al., 2011; Pardee et al., 2014; Zachar et al., 2011)</b>                                                                                                                        | Over-expression in gastric cancer(Goh et al., 2015)       |
| <b>PHGDH</b>                                 | Glycine, serine and threonine | CBR-5884(Mullarky et al., 2016)                                                                                                                                                                   | Copy number amplification in multiple cancers(Locasale et |

---

---

|             |                                          |                                                                                                                   |                                                                                                                                                                                                                                                                             |
|-------------|------------------------------------------|-------------------------------------------------------------------------------------------------------------------|-----------------------------------------------------------------------------------------------------------------------------------------------------------------------------------------------------------------------------------------------------------------------------|
|             | metabolism                               | NCT-502, NCT-503(Pacold et al., 2016)<br>PKUMDL-WQ-2101,<br>PKUMDL-WQ-2201(Wang et al., 2017)                     | al., 2011; Possemato et al., 2011)                                                                                                                                                                                                                                          |
| <b>PSAT</b> | Glycine, serine and threonine metabolism |                                                                                                                   | Essential for breast cancer proliferation(Possemato et al., 2011); miR-340, which inhibits PSAT, suppresses cell growth and invasion in esophageal cancer(Yan et al., 2015); association with the proliferation and drug resistance of colon cancer cells(Vie et al., 2008) |
| <b>PSPH</b> | Glycine, serine and threonine metabolism |                                                                                                                   | Over-expression in hepatocellular carcinoma(Sun et al., 2015)                                                                                                                                                                                                               |
| <b>SOD</b>  |                                          | <b>Mangafodipir,</b><br><b>Cal-mangafodipir, 2ME,</b><br><b>ENMD-1198,</b><br><b>ATN-224(Sborov et al., 2015)</b> |                                                                                                                                                                                                                                                                             |
| <b>RPI</b>  | Pentose phosphate pathway                |                                                                                                                   | Over-expression in hepatocellular carcinoma, essential for cancer cell growth(Ciou et al., 2015); Its ablation inhibits the proliferation of colorectal                                                                                                                     |

---

---

cancer cells(Qiu et al., 2015)

**UMP**      Pyrimidine  
              metabolism

---

## Figure Legends

**Fig 1. Four-objective optimization model for cancer metabolism.** (A) Illustration of the four metabolic objectives incorporated in this model. (B) Mathematical description of the model and approximate Pareto surface projected on four ternary combinations of included objectives. Data points are presented in shade to depict the shape of Pareto surface.

**Fig 2. Individualized Pareto models for NCI-60 cancer cell lines predict cell proliferation rates and responses to metabolic gene ablations.** (A) Illustration of the strategy used in constructing the individualized models based on multiple omics datasets. (B) Comparison between actual and model-predicted cell growth rates in the NCI-60 cancer cell panel. (C) Illustration of Pareto deviation score (PDS) as a metric quantifying the impact of metabolic perturbation on cell viability. (D) Distribution of Spearman's rank correlation coefficients between model-predicted PDS values and sensitivity scores for metabolic gene ablations in the Achilles Database.

**Fig 3. Metabolic targets identified by Pareto surface analysis exhibit strong correlations with cancer progression and patient prognosis.** (A) Illustration of the criteria for target identification. (B) Workflow of identifying potential metabolic targets essential for cell proliferation and the Warburg effect. (C) A simplified illustration of glucose utilization in biomass synthesis and lactate production. (D) Summary of different categories of identified targets. (E) C1 enzymes and their

monotonousness scores. (F) C2 enzymes and their monotonousness scores. (G)-(I) Results of Kaplan-Meier survival analysis of genes encoding C1, C2 and C3 enzymes. (J) and (K) Distribution of biomass production and extent of the Warburg effect predicted by the individualized models of breast tumor and adjacent normal tissues based on their gene expression profiles in TCGA. (L) Expression levels of genes associated with C1 enzymes in breast tumors and adjacent normal tissues. (M) Expression levels of genes associated with C2 enzymes in breast tumors and adjacent normal tissues. Significance levels: \*:  $p < 0.05$ ; \*\*:  $p < 0.01$ ; \*\*\*:  $p < 0.001$ ; \*\*\*\*:  $p < 0.0001$ .

**Fig 4. Knockdowns of C1 enzymes impair cancer cell proliferation.** (A-D) Relative mRNA expression levels of AHCY, RPIA, PHGDH and PSAT1 upon shRNA knockdown in the tested cell lines. (E-H) Number of cells after 4 days upon shRNA knockdown of AHCY, RPIA, PHGDH and PSAT1 in the tested cell lines.

**Fig 5. Knockdowns of C1 enzymes have minimal effect on the Warburg effect.** (A) Effects of AHCY knockdown on lactate secretion. (B) Effects of RPIA knockdown on lactate secretion. (C) Effects of PHGDH knockdown on lactate secretion. (D) Effects of PSAT1 knockdown on lactate secretion.

**Figure 1**

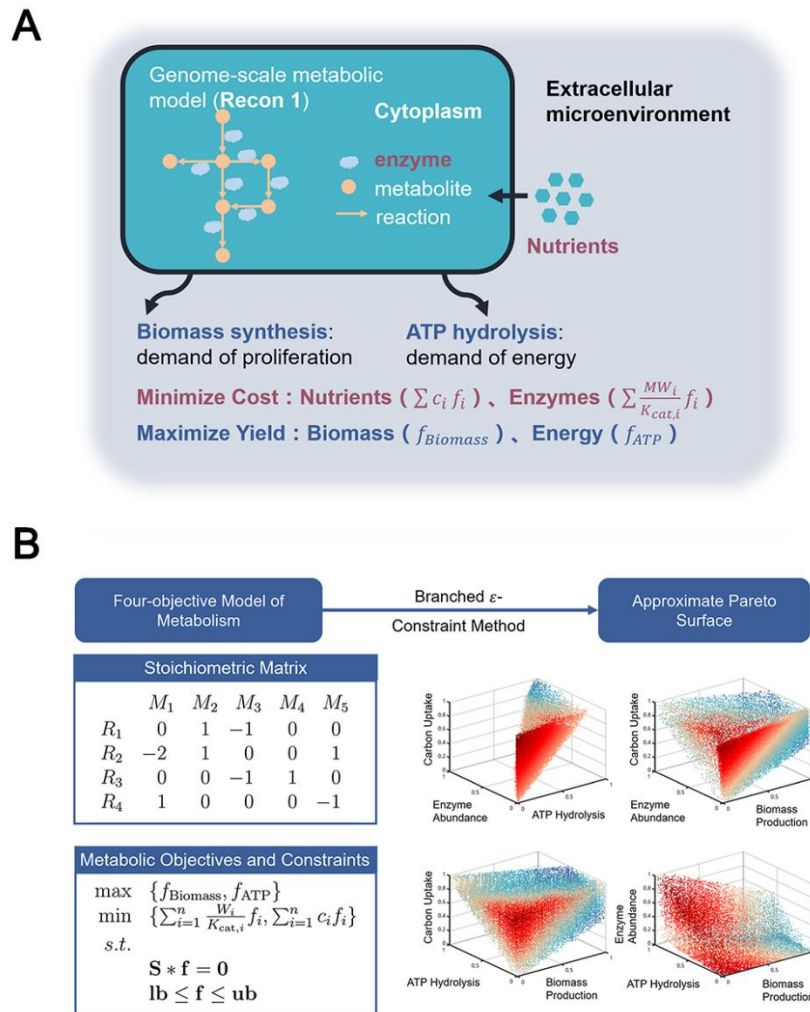

**Figure 2**

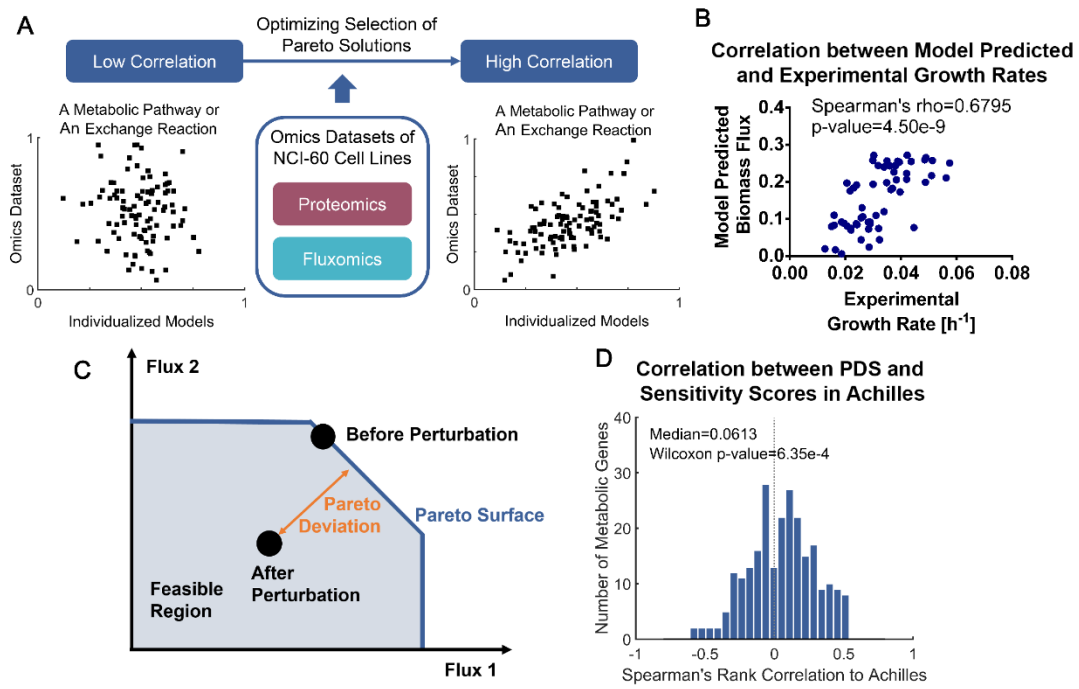



**Figure 3**

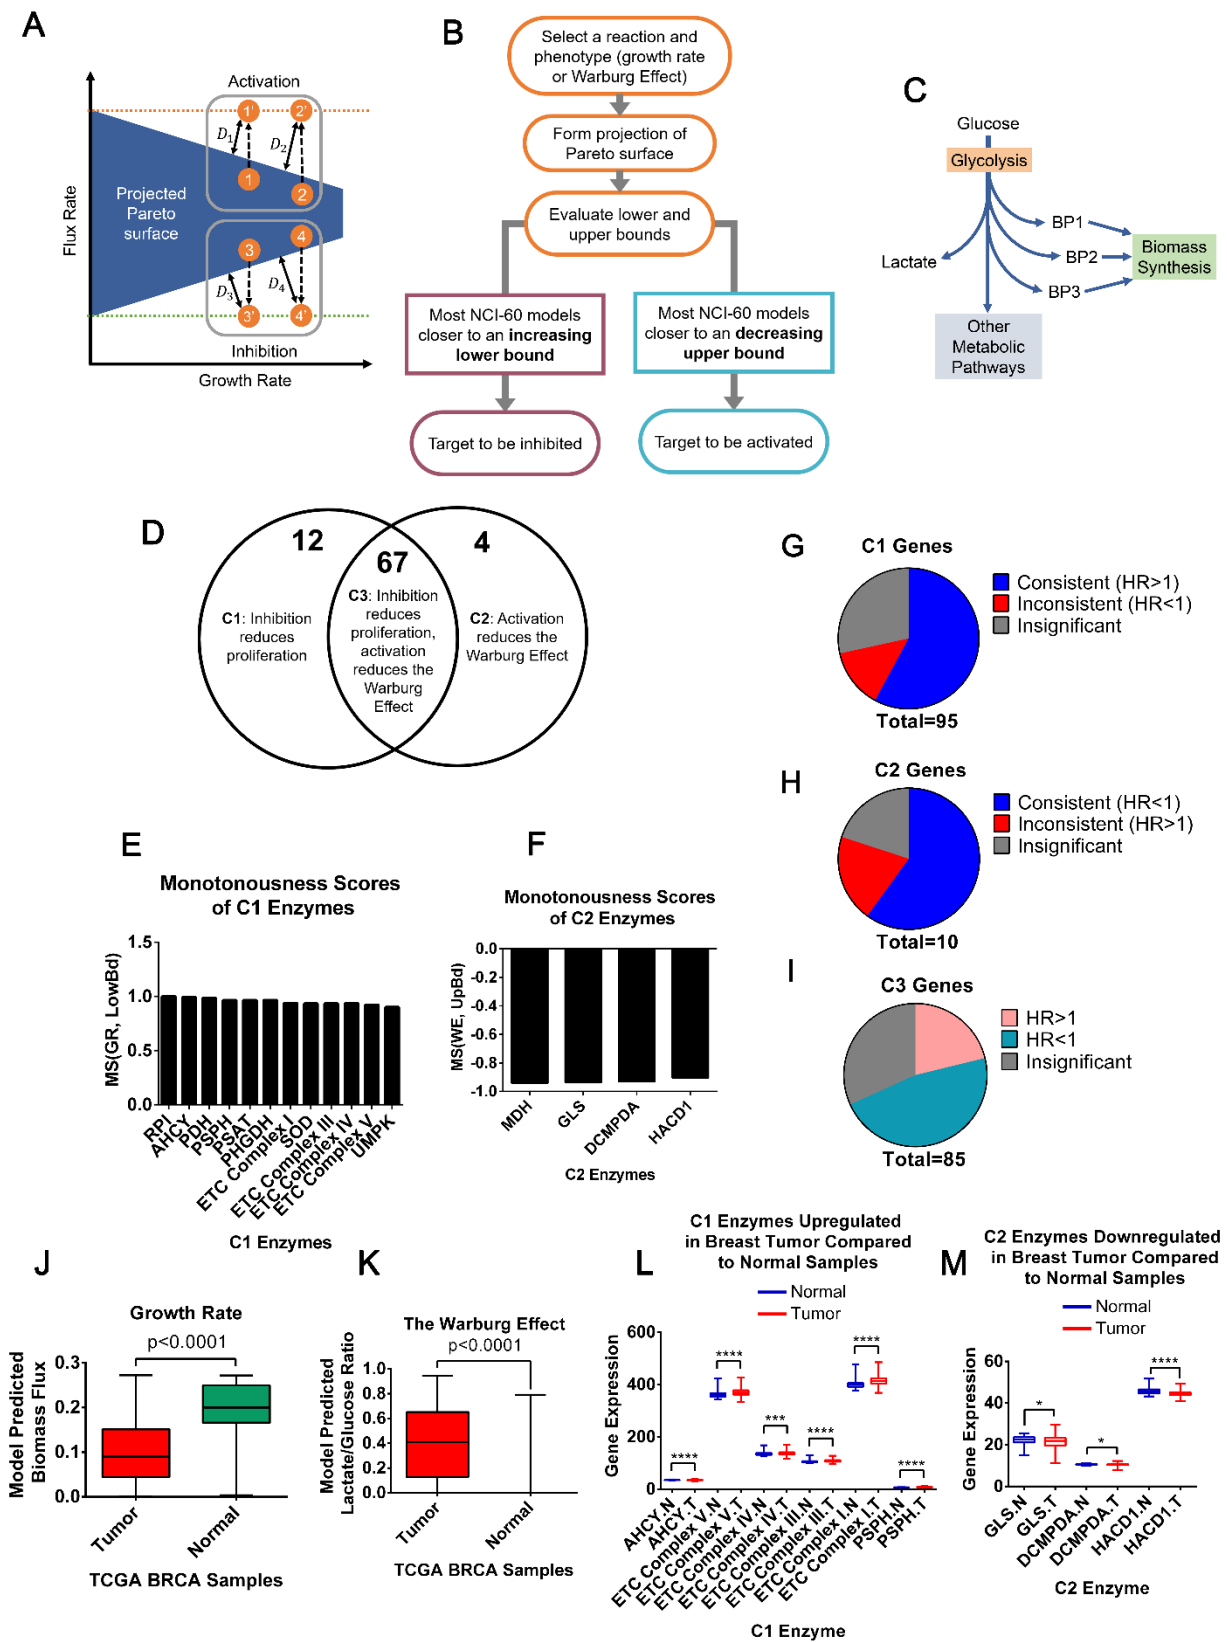

**Figure 4**

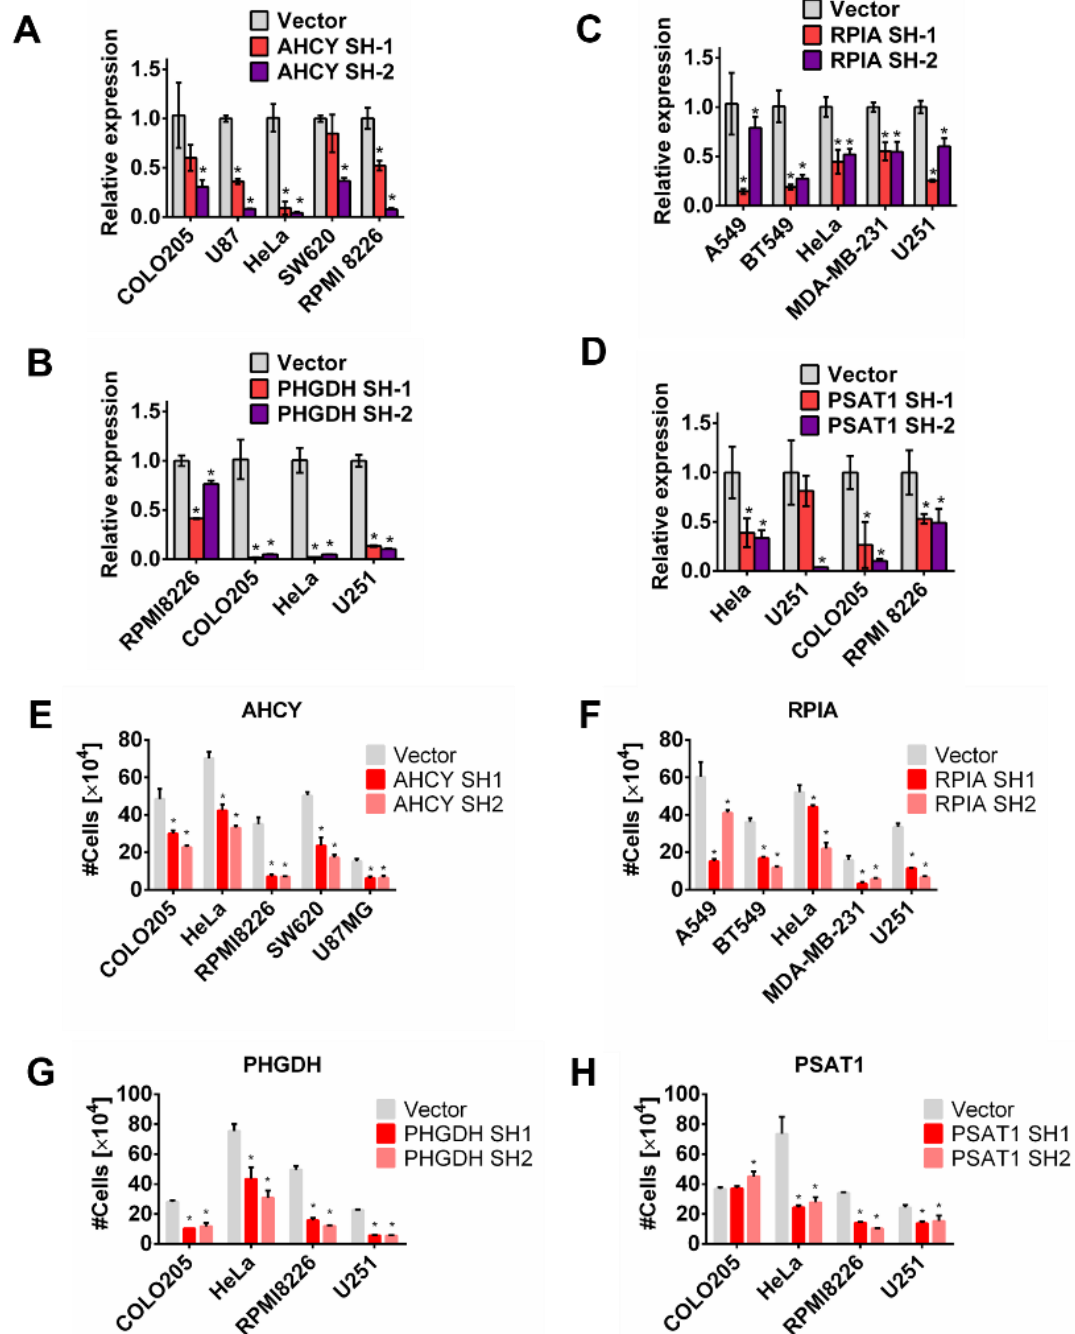

**Figure 5**

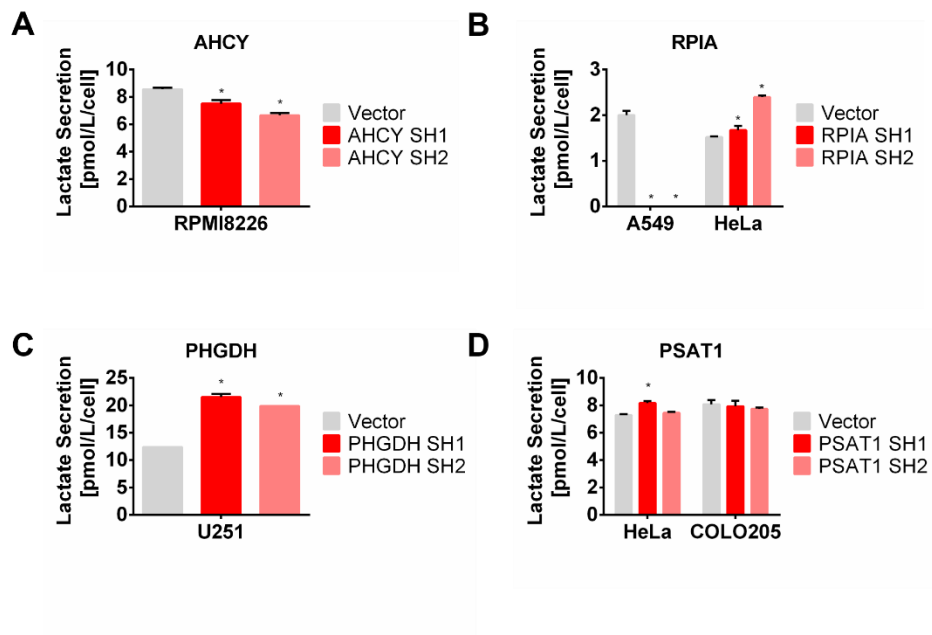

Source: https://www.biorxiv.org/content/10.1101/198333v1.full.pdf
